# Supplementary material for: A Participatory Agrobiodiversity Conservation Approach in the Oases: Community Actions for the Promotion of Sustainable Development in Fragile Areas
Source: MDPI journal article supplement (doi:10.3390/d13060253), 2021-06-08
Supplement: s1 [file s1]

## QUESTIONNAIRE FOR SEMI-STRUCTURED INTERVIEWS TO FARMERS

|      |  |             |  |             |  |
|------|--|-------------|--|-------------|--|
| Date |  | Interviewer |  | Parcel code |  |
|------|--|-------------|--|-------------|--|

### Parcel location

|                |  |                 |  |
|----------------|--|-----------------|--|
| GDA            |  | GPS coordinates |  |
| Parcel area    |  | GDA sector      |  |
| Sector toponym |  | Parcel toponym  |  |

|                                        |              |  |                          |  |                   |  |
|----------------------------------------|--------------|--|--------------------------|--|-------------------|--|
| Parcel access<br>Status of<br>accesses | Asphalt road |  | Carriageable farm track  |  | Narrow farm track |  |
|                                        |              |  |                          |  |                   |  |
| Distance from asphalt road             |              |  | Distance from power grid |  |                   |  |

### Farmer data

|           |  |              |  |         |  |     |  |
|-----------|--|--------------|--|---------|--|-----|--|
| Surname   |  | Name         |  | Sex     |  | Age |  |
| Owner?    |  | Sharecropper |  | Manager |  |     |  |
| Telephone |  |              |  |         |  |     |  |

|                       |  |
|-----------------------|--|
| Agricultural training |  |
| Distance from home    |  |

| Other parcels owned or cultivated at el-Hamma |       |      |
|-----------------------------------------------|-------|------|
| GDA                                           | Areas | Role |
|                                               |       |      |
|                                               |       |      |

| Decisions making for parcel management |  |                                                     |  | Yes |                   | No |  |
|----------------------------------------|--|-----------------------------------------------------|--|-----|-------------------|----|--|
| On water rounds?                       |  | On the varieties to cull/to introduce?              |  |     | About sales?      |    |  |
| On farm works?                         |  | On the introduction of tree or horticultural crops? |  |     | About purchasing? |    |  |

| Parcel management mode |                      |
|------------------------|----------------------|
| Owner                  |                      |
| Family help            | By:                  |
| Workers                | Days or months/year: |
| Sharecropper           |                      |
| Main activities        |                      |
| Said activities        |                      |

|                                                  |     |  |    |  |
|--------------------------------------------------|-----|--|----|--|
| Interest in increasing work hours and farm rents | Yes |  | No |  |
|--------------------------------------------------|-----|--|----|--|

|                                 |  |  |  |  |
|---------------------------------|--|--|--|--|
| Farmer's limits and suggestions |  |  |  |  |
|---------------------------------|--|--|--|--|

## The Parcel

|             |                  |  |              |  |                 |  |
|-------------|------------------|--|--------------|--|-----------------|--|
| Type        | Ancient oasis    |  | Modern oasis |  | New             |  |
| Origin      | Inherited        |  | Sold         |  | Donated         |  |
| Land regime | Private property |  |              |  | Family property |  |

|           |             |                           |               |  |          |  |
|-----------|-------------|---------------------------|---------------|--|----------|--|
| N° palms  |             | Of which male pollinators |               |  |          |  |
| Palms Age | Homogeneous |                           | Heterogeneous |  | Main age |  |

|                 |    |                         |                 |
|-----------------|----|-------------------------|-----------------|
| Palms varieties | N° | Average production/palm | Sucker presence |
|                 |    |                         |                 |
|                 |    |                         |                 |

|                                                            |     |  |    |  |
|------------------------------------------------------------|-----|--|----|--|
| Interest in increasing the number of traditional varieties | Yes |  | No |  |
| Wich ones?                                                 |     |  |    |  |
| Why?                                                       |     |  |    |  |
| Famer's comments                                           |     |  |    |  |

| Fruit trees   | Variety | N° | Origin | Production destination | Sale circle | Average price 2018 |
|---------------|---------|----|--------|------------------------|-------------|--------------------|
| Olive trees   |         |    |        |                        |             |                    |
| Pomegranates  |         |    |        |                        |             |                    |
| Vineyards     |         |    |        |                        |             |                    |
| Apricot trees |         |    |        |                        |             |                    |
| Peach trees   |         |    |        |                        |             |                    |
| Figs          |         |    |        |                        |             |                    |
| Citrus trees  |         |    |        |                        |             |                    |

|                                                                                      |     |  |    |  |
|--------------------------------------------------------------------------------------|-----|--|----|--|
| Interest in increasing the number of traditional varieties or or start growing them? | Yes |  | No |  |
| Wich ones?                                                                           |     |  |    |  |
| Famer's comments                                                                     |     |  |    |  |

| Vegetables  | Variety | Areas cultivated | Origin seed | Production destination | Sale circle | Average price 2018 |
|-------------|---------|------------------|-------------|------------------------|-------------|--------------------|
| Chilli      |         |                  |             |                        |             |                    |
| Melon       |         |                  |             |                        |             |                    |
| Okra        |         |                  |             |                        |             |                    |
| Corète      |         |                  |             |                        |             |                    |
| Swiss chard |         |                  |             |                        |             |                    |
| Carrot      |         |                  |             |                        |             |                    |
| Salad       |         |                  |             |                        |             |                    |
| Onion       |         |                  |             |                        |             |                    |

|         |         |                  |             |                        |             |                    |
|---------|---------|------------------|-------------|------------------------|-------------|--------------------|
| Forage  | Variety | Areas cultivated | Origin seed | Production destination | Sale circle | Average price 2018 |
| Alfalfa |         |                  |             |                        |             |                    |

|                                                       |     |  |    |  |
|-------------------------------------------------------|-----|--|----|--|
| Interest in increasing the number of common varieties | Yes |  | No |  |
| Wich ones?                                            |     |  |    |  |
| Famer's comments                                      |     |  |    |  |

|           |    |
|-----------|----|
| Livestock | N° |
| Sheep     |    |
| Goats     |    |
| Cattle    |    |
| Cattle    |    |

|                                                     |     |  |    |  |
|-----------------------------------------------------|-----|--|----|--|
| Lodging in the parcel                               | Yes |  | No |  |
| Livestock fed with fodder grown in the plot         | Yes |  | No |  |
| Fertilized plot with manure from your own livestock | Yes |  | No |  |

|                                                       |  |  |  |  |
|-------------------------------------------------------|--|--|--|--|
| Interest in increasing the number of common varieties |  |  |  |  |
| Famer's comments                                      |  |  |  |  |

### Irrigation

|              |               |  |              |  |                         |  |
|--------------|---------------|--|--------------|--|-------------------------|--|
| Water origin | National well |  | Private well |  | Collective-private well |  |
| Water price  |               |  |              |  |                         |  |

|                                                                                              |        |  |                      |    |  |
|----------------------------------------------------------------------------------------------|--------|--|----------------------|----|--|
| Water turn duration (hours, minutes)                                                         |        |  |                      |    |  |
| Average distance between 2 water turns (days)                                                | Summer |  | Autumn/winter/spring |    |  |
| Possibility to choose the frequency of the water turn                                        | Yes    |  |                      | No |  |
| Number of water rounds purchased each year                                                   |        |  |                      |    |  |
| Farmer considerations about approximating water shifts and reducing the duration of each one |        |  |                      |    |  |

|                   |            |  |        |  |
|-------------------|------------|--|--------|--|
| Irrigation method | Submersion |  | Others |  |
|-------------------|------------|--|--------|--|

|                                     |                         |  |                   |  |              |  |
|-------------------------------------|-------------------------|--|-------------------|--|--------------|--|
| Water supply channels in the parcel | Channels buried in soil |  | Cemented channels |  | PVC channels |  |
| State of the water supply chain     | Good                    |  | Bad               |  |              |  |

|                                 |                   |  |              |  |
|---------------------------------|-------------------|--|--------------|--|
| Side water supply channels      | Cemented channels |  | PVC channels |  |
| State of the water supply chain | Good              |  | Bad          |  |

|                                                                                                                    |     |                |    |       |
|--------------------------------------------------------------------------------------------------------------------|-----|----------------|----|-------|
| Basin in the plot                                                                                                  | Yes |                | No |       |
| Interest in making a basin                                                                                         | Yes |                | No |       |
| Localized irrigation                                                                                               | Yes |                | No |       |
| Interest in localized irrigation                                                                                   | Yes |                | No |       |
| Farmer considerations about the possibility to access to national subsidies to realise water saving interventions. |     |                |    |       |
| Farmer Perceived Water Quality                                                                                     |     |                |    |       |
| Good                                                                                                               |     | Slightly salty |    | Salty |

### Drainage

|                                                   |            |  |                    |  |
|---------------------------------------------------|------------|--|--------------------|--|
| Visibly hydromorphic soil<br>Drains in the parcel | Yes        |  | No                 |  |
|                                                   | Yes        |  | No                 |  |
| Drains type                                       | Open space |  | A canali interrati |  |
| Drain status                                      | Good       |  | Bad                |  |

### Mechanization

|                     |     |  |    |  |
|---------------------|-----|--|----|--|
| Mechanization       | Yes |  | No |  |
| Owned instruments   |     |  |    |  |
| Rented instruments  |     |  |    |  |
| Desired instruments |     |  |    |  |

### Current soil management

|                                     |                         |  |       |  |         |                  |
|-------------------------------------|-------------------------|--|-------|--|---------|------------------|
| Soil filling                        |                         |  | Yes   |  | No      |                  |
| Total                               | One time each..... year |  |       |  | Partial | 1/..... per year |
| Filling sand                        | Cm                      |  | Price |  | Origin  |                  |
| Filling fertilizer                  | q/ha                    |  | Price |  | Origin  |                  |
| Use of compost                      |                         |  | Yes   |  | No      |                  |
| Interest in compost use in the oasi |                         |  | Yes   |  | No      |                  |
| Reasons for non-use                 |                         |  |       |  |         |                  |

|                         |       |        |                  |  |    |  |
|-------------------------|-------|--------|------------------|--|----|--|
| Mineral fertilizer      |       |        | Yes              |  | No |  |
| Ammonium Nitrate        | Kg/ha | Period | Fertilized crops |  |    |  |
| DAP (Biamonic Phosphate |       |        |                  |  |    |  |
| NP 18-46)               |       |        |                  |  |    |  |
| Others                  |       |        |                  |  |    |  |

|                     |
|---------------------|
| Reasons for non-use |
|---------------------|

|              |                       |         |                  |  |
|--------------|-----------------------|---------|------------------|--|
| Green manure | Yes                   |         | No               |  |
| Total        | 1 time each.....years | Partial | 1/..... per year |  |
| Depth        |                       |         |                  |  |

|                           |               |  |        |  |
|---------------------------|---------------|--|--------|--|
| Weeds management          | Yes           |  | No     |  |
| Frequency                 | Each.....year |  |        |  |
| Inactive biomass cleaning | Yes           |  | No     |  |
| Cleaning evaluation       | Good          |  | Medium |  |
|                           |               |  | Bad    |  |

|                       |                   |
|-----------------------|-------------------|
| Phytosanitary control | Means of fighting |
| Main disease          |                   |
| Main pest             |                   |
| Farmer considerations |                   |

### Wild boar

|                                 |            |  |               |  |
|---------------------------------|------------|--|---------------|--|
| Visible damages                 | Yes        |  | No            |  |
| Nature of damages               |            |  |               |  |
| Protective fences               | Yes        |  | No            |  |
| Protection level for the farmer | Satisfying |  | No-satisfying |  |
| Solutions proposed by farmer    |            |  |               |  |

### Estimate of main expenses (DT)

|                                |  |
|--------------------------------|--|
| Water                          |  |
| Fertilization                  |  |
| Pollination                    |  |
| Harvesting of bunches of dates |  |
| Phytosanitary control          |  |
| Labor wages                    |  |
| Others                         |  |

### Sale of dates

| Variety | Sale way             |                      |                                   |                          |                    | No Sale  |       |       |
|---------|----------------------|----------------------|-----------------------------------|--------------------------|--------------------|----------|-------|-------|
|         | For palm (collector) | Total harvest + sale | Total harvest + conservation sale | Staggered harvest + sale | Average price 2018 | Quantity | Price | Other |
|         |                      |                      |                                   |                          |                    |          |       |       |
|         |                      |                      |                                   |                          |                    |          |       |       |
|         |                      |                      |                                   |                          |                    |          |       |       |

**Sale of other products**

| Products   | Sale                            |                           |                                 | No Sale  |       |       |
|------------|---------------------------------|---------------------------|---------------------------------|----------|-------|-------|
|            | To a collector:<br>local market | Direct to<br>local market | Direct to<br>national<br>market | Quantity | Price | Other |
| Vegetables |                                 |                           |                                 |          |       |       |
| Forage     |                                 |                           |                                 |          |       |       |
| Fruits     |                                 |                           |                                 |          |       |       |
| Livestock  |                                 |                           |                                 |          |       |       |
| Milk       |                                 |                           |                                 |          |       |       |
| Wool       |                                 |                           |                                 |          |       |       |
|            |                                 |                           |                                 |          |       |       |

**Supply**

|                          | Supply         |                 |                    | No Supply |            |      |           |
|--------------------------|----------------|-----------------|--------------------|-----------|------------|------|-----------|
|                          | From<br>parcel | Local<br>market | National<br>market | Quantity  | High price | Rare | Transport |
| Organic<br>fertilizer    |                |                 |                    |           |            |      |           |
| Mineral<br>fertilizer    |                |                 |                    |           |            |      |           |
| Seeds                    |                |                 |                    |           |            |      |           |
| Pest control<br>products |                |                 |                    |           |            |      |           |
| Equipment                |                |                 |                    |           |            |      |           |
| Forages<br>concentrates  |                |                 |                    |           |            |      |           |
